# Supplementary material for: Immunoproteomic Approach of Extracellular Antigens From Paracoccidioides Species Reveals Exclusive B-Cell Epitopes
Source: Front Microbiol. 2020 Jan 28;10:2968. doi: 10.3389/fmicb.2019.02968 (PMC7015227; doi:10.3389/fmicb.2019.02968)
Supplement: TABLE S3 — Identification of exoantigens recognized by serum from animals immunized with P. brasiliensis secretome. [file Table_3.xlsx]

## Sheet: Table S3
Table S3. Identification of exoantigens recognized by serum from animals immunized with P. brasiliensis secretome.
Access Number 1	Protein name	MM/pI2	SigP3	SecP4	Location5	Secreted6	Biological function1	Peptides (MS/MS)	Score
PADG_08054	Malate dehydrogenase NAD-dependent	38035/8.85	N	Y	Cytoplasmic	Y	tricarboxylic-acid pathway (citrate cycle, Krebs cycle, TCA cycle)	21.6667	4302.48
PADG_04288	Endoribonuclease L-PSP	13659/5.87	N	N	Cytoplasmic	N	purin nucleotide/nucleoside/nucleobase metabolism	4.66667	5660.84
PADG_06494	Dihydrolipoyl dehydrogenase	55465/8.02	N	N	Mitochondrial	N	tricarboxylic-acid pathway (citrate cycle, Krebs cycle, TCA cycle)	21.3333	2294.79
PADG_08118	HSP 70-like protein	70992/5.07	N	N	Cytoplasmic	N	protein folding and stabilization	19.6667	1675.96
PADG_04710	2-methylcitrate synthase mitochondrial	51619/9.20	N	N	Mitochondrial	N	C-2 compound and organic acid catabolism	19.6667	1415.72
PADG_05922	Glutamate carboxypeptidase	63688/6.36	N	N	Mitochondrial	N	protein/peptide degradation	14.6667	981.13
PADG_06490	Formamidase	42889/5.69	N	N	Cytoplasmic	N	nitrogen, sulfur and selenium metabolism	11	1076.7
PADG_01209	Enoyl-CoA hydratase	31597/8.87	N	N	Mitochondrial	N	lipid, fatty acid and isoprenoid metabolism	8.5	821.227
PADG_07674	Carbonic anhydrase	32697/9.11	N	N	Mitochondrial	N	C-compound and carbohydrate metabolism	8.66667	644
PADG_02847	2,4-dihydroxyhept-2-ene-1,7-dioic acid aldolase	32906/5.46	N	N	Mitochondrial	Y	C-compound and carbohydrate metabolism	5	628.448
PADG_08673	Lactoylglutathione lyase	36809/5.60	N	Y	Nuclear	Y	C-compound and carbohydrate metabolism	5	564.421
PADG_05841	PTH1 family peptidyl-tRNA hydrolase	30089/9.90	N	Y	Mitochondrial	N	translation	8	487.183
PADG_07627	4-carboxymuconolactone decarboxylase family protein	20960/5.33	N	N	Cytoplasmic	N	Benzoate degradation	6	470.113
PADG_03149	Aminopeptidase 2	108582/6.51	N	N	Mitochondrial	N	protein/peptide degradation	31	461.823
PADG_00459	Ribosome biogenesis protein BMS1	33522/5.83	Y	N	Extracellular	Y	ribosome biogenesis	9.5	544.881
PADG_12370	Endo-1,3(4)-beta-glucanase	84106/7.13	Y	Y	Peroxisomal	N	C-compound and carbohydrate metabolism	17	633.708
PADG_01372	Mannitol-1-phosphate 5-dehydrogenase	43131/5.73	N	N	Cytoplasmic	N	C-compound and carbohydrate metabolism	11	607.736
1-Protein access number and functional category were based on UniProt database (www.uniprot.org);
2-Molecular mass (MM) obtained by nanoUPLC-MSE. Isoeletric point (pI) predicted by ExPASy software;
3-Prediction of secretion according to the SignalP server 4.1. (Score ≥ 0.5) (http://www.cbs.dtu.dk/services/SignalP/);
4-Prediction of secretion according to the SecretomeP 2.0 server. (Score ≥ 0.5) (http://www.cbs.dtu.dk/services/SecretomeP/);
5-Subcellular localization of proteins - WoLF PSORT (https://wolfpsort.hgc.jp/);
6-Proteins predicted as secreted according to WoLF PSORT software (https://wolfpsort.hgc.jp/);

## Sheet: Controls
protein.Accession	protein.Description	protein.dataBaseType	protein.MW	ScoreAVG	ProductsAVG	PeptidesAVG	FmolAVG	FmolCV	Log10FmolAVG	ngramAVG	Repeate.rate	TOP3AVG	CoverageAVG	TOP3CV	NgramVariance
PADG_01702	hypothetical protein (191 aa)	Regular	20240.4	339.028	18	6	544.439	NaN	2.73595	11.0196	1	1154988	7.37	NaN	NaN
PADG_08369	hsp60-like protein (596 aa)	Regular	62560.4	335.079	57	16	36.1646	NaN	1.55828	2.2625	1	76720.5	7.39	NaN	NaN
PADG_11779	hypothetical protein (70 aa)	Regular	7371.8	454.72	8	1	29.293	NaN	1.46676	0.2159	1	83676	11.59	NaN	NaN
