# Supplementary material for: Immunoproteomic Approach of Extracellular Antigens From Paracoccidioides Species Reveals Exclusive B-Cell Epitopes
Source: Front Microbiol. 2020 Jan 28;10:2968. doi: 10.3389/fmicb.2019.02968 (PMC7015227; doi:10.3389/fmicb.2019.02968)
Supplement: TABLE S5 — Exoantígens of Paracoccidioides species identified as exclusive during immunoproteomic analyzes. [file Table_5.XLSX]

## Sheet: Table S5
Table S5: Exoantígens of Paracoccidioides species identified as exclusive during immunoproteomic analyzes.
P. lutzii	P. brasiliensis
PAAG_07509 - Peptidyl-prolyl cis-trans isomerase ssp1	PADG_04288 - Endoribonuclease L-PSP
PAAG_04814 - Nucleic acid-binding protein	PADG_01209 - Enoyl-CoA hydratase
PAAG_12701 - Hypothetical protein	PADG_02847 - 2,4-dihydroxyhept-2-ene-1,7-dioic acid aldolase
PAAG_05807 - Hypothetical protein	PADG_08673 - Lactoylglutathione lyase
PAAG_12630 - Hypothetical protein	PADG_05841 - PTH1 family peptidyl-tRNA hydrolase
PAAG_06925 - Glutamate-1-semialdehyde 2,1-aminomutase	PADG_00459 - Ribosome biogenesis protein BMS1
PAAG_08322 - Hypothetical protein	PADG_01372 - Mannitol-1-phosphate 5-dehydrogenase
P. americana	P. restrepiensis
PABG_00772 - Metallopeptidase MepB	A0A1E2YEX1 - Glutathione-disulfide reductase
PABG_02034 - Hsp7-like protein	A0A1D2JLK0 - Proteasome component PRE4
PABG_00534 - Serine protease	A0A1D2J6S5 - O-acetylhomoserine (thiol)-lyase
PABG_00248 - Grp1p	A0A1D2J6N9 - Transketolase
	A0A1D2JK84 - Proteasome component PRE3
	A0A1E2Y269 - 60S ribosomal protein L5
	A0A1D2JLX5 - Proteasome component PRE6
	A0A1E2XYU6 - 40S ribosomal protein S5
	A0A1D2J7B1 - Gamma-glutamyltransferase
	A0A1E2Y9V4 - 60S ribosomal protein L2-A
	A0A1D2JPP3 - HAD-superfamily hydrolase
	A0A1E2Y9T2 - Single-strand binding protein family
	A0A1D2JMM5 - Oxidoreductase
	A0A1D2JQD5 - Extradiol ring-cleavage dioxygenase
	A0A1E2YCS7 - ATP synthase subunit D
	A0A1E2Y490 - ER lumen protein retaining receptor 2
